# Supplementary material
Source: Springer Nature journal article supplement (https://www.springermedizin.de/resource/supplementary/12992_2009_59_MOESM4_ESM.pdf/9616404)

**Quantity (tonnes)**

— Total poultry imports (4 digit HS code: 0207)

- - - Imports of chicken leg quarters (10 digit HS code: 0207140010)

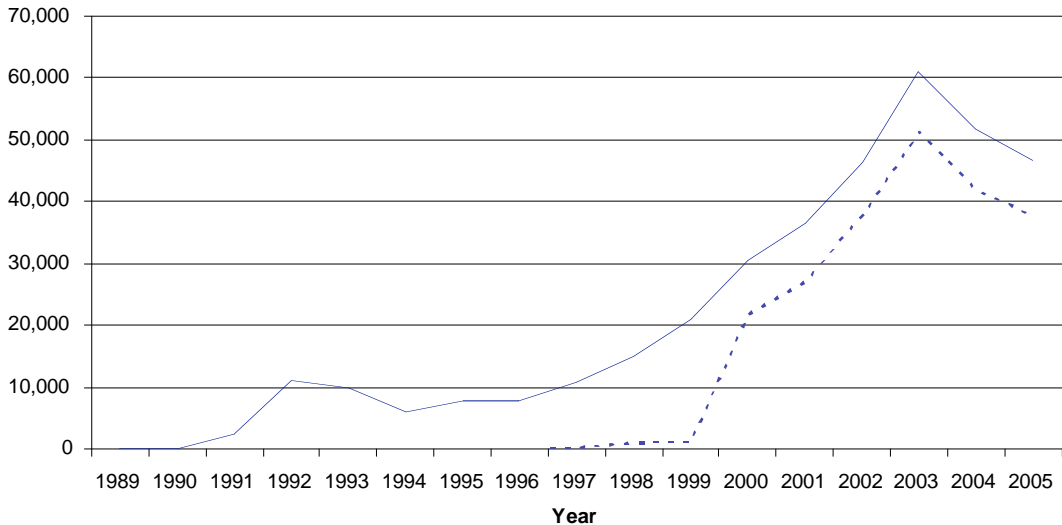

Supplement: MOESM4 [file 9616404]
